# Supplementary material
Source: publisher figshare collection journal article supplement (https://acs.figshare.com/ndownloader/files/4527070)
Supplement: Supplementary file 1 [file 4527070]

## Supplementary table

**Table S1. List of the identified proteins by LC-ESI-MS/MS and bioinformatics analyses.** The table shows the sequence of all the peptides identified by MS/MS fragmentation and the associated statistical information obtained from database searches conducted by BioworksBrowser using TurboSEQUEST<sup>®</sup> software. For each identified protein, statistical information related to alignment analysis of identified peptides by FASTS software is reported. **Spot ID:** spot identifier number. **Protein A.N.:** protein NCBI accession number (version). **DB:** database used for the search; NR= protein non-redundant database downloaded from NCBI (5947209 entries); EST= subset of *Lolium* EST sequences downloaded from NCBI (13919 entries). The searches against the two corresponding sequence-reversed databases didn't identify any positive hit. **n. pep.:** number of the peptides used to identify the protein, computed counting peptides with the same primary sequence, even if they present different modification or charge states, as one. **a.a. cov. (%):** sequence coverage %. **FASTS (E) value:** FASTS expectation (E) values of the entry resulting from the alignment of peptides against NR. **Hom. Protein A.N.:** homologous protein accession number (version). **EST A.N.:** EST NCBI accession number (version). **Peptide:** sequence of the identified peptides; the symbol M\* indicates oxidized methionine. **MH+:** molecular mass of the peptide; **z:** charge state of the peptide. **Sf:** SEQUEST Sf score. **Xcorr:** SEQUEST cross-correlation value. **ΔCn:** delta correlation value. **Sp:** SEQUEST preliminary score. **(a):** value referred to the mature form of the protein.
